# Supplementary material
Source: Research Square preprint supplement (doi:10.21203/rs.3.rs-10092554/v1)
Supplement: Supplementary file 1 [file 9f2defc9e76acbb03d5f68dd.docx]

**Supplemental Materials**

1. **Supplemental Methods**
2. **Supplemental Clinical Case preparations**
3. **Supplemental Tables**
4. **Supplemental Figure**
5. **Supplemental Videos**
6. **Supplemental References**
7. **Supplemental Methods**

**1.1 Exome and genome sequencing analysis**

For exome (ES) and genome sequencing (GS), genomic DNA was extracted from peripheral blood lymphocytes or buccal swab samples of the probands and parents (when available). After standard DNA extraction, trio-exome or genome sequencing was performed in all subjects as previously described (Aspromonte et al., 2019; Bowling et al., 2017; Harripaul et al., 2017; Murdock et al., 2021; Tarailo-Graovac et al., 2016; Guillen Sacoto et al., 2020, Retterer K et al., 2016).

QC statistics with FastQC (http://www.bioinformatics.bbsrc.ac.uk/projects/fastqc) was used to assess the quality of the sequence reads. BWA with default parameters was used for reads alignment to the reference human genome (GRCh38 - hg38, UCSC genome assembly). Recalibration of the quality score and for indel realignment and variant calling was performed through the HaplotypeCaller algorithm within the GATK package (DePristo et al., 2011; McKenna et al., 2010). Variants were then annotated with ANNOVAR (Wang et al., 2010) and filtered out for minor allele frequency (MAF) ≤ 0.01 in genomic databases (GnomAD v4.1.0, https://gnomad.broadinstitute.org).

Afterwards, in silico tools were employed to predict the impact of candidate variants on protein structure and function, including: Combined Annotation Dependent Depletion (CADD, https://cadd.gs.washington.edu), Mutation Taster (http://www.mutationtaster.org), Mutation Assessor (http://mutationassessor.org/r3/), Polyphen-2 (http://genetics.bwh.harvard.edu/pph2/), and Splice AI (https://spliceailookup.broadinstitute.org). Sanger sequencing was performed according to standard procedures (Tarailo-Graovac et al., 2016) to confirm the most plausible candidate variants and for parental segregation analysis.

**1.2 Copy Number Variations analysis**

For the detection of copy number variations (CNVs), array comparative genomic hybridization (Array-CGH), SNP-array, or exome-based CNVs calling were performed. Array-CGH (Agilent 60K) was performed as previously described (Redon et al., 2009). For SNP-array, DNA was extracted from uncultured cells and the array platform Infinium CytoSNP-850K v1.2 (Illumina) was employed, using genome build was GRCH37/hg19. Exome-based CNVs calling was performed using a custom-developed analysis tool (XomeAnalyzer). Data were filtered and analyzed to identify sequence variants and most deletions and duplications involving three or more coding exons, as previously described (Retterer et al., 2015). Potential rearrangements were interpreted according to the Decipher database (<https://decipher.sanger.ac.uk>).

1. **Supplemental Clinical Case preparations**

### **Summary of clinical variability**

Across the cohort, clinical presentation ranged from severe congenital neurodevelopmental impairment to adult-onset progressive motor disease. Psychomotor regression was absent in 4/14 individuals, and normal neuroimaging was observed in a subset of cases despite significant clinical impairment. Neurobehavioral manifestations were present across multiple individuals, indicating involvement beyond motor and developmental domains.

**Case 1**

The proband is a 17-year-old male, the third child of healthy, non-consanguineous parents, born at 38 weeks of gestation via cesarean section for breech presentation complicated by a displaced femoral fracture. Early psychomotor development was unremarkable, with independent walking achieved without a prior crawling phase. At 8 months of age, he experienced five afebrile seizures, which were successfully managed with valproate until age 9. From early childhood, he exhibited progressive gait imbalance, frequent falls, and lower-limb stiffness that gradually evolved into spastic paraparesis with distal amyotrophy and bilateral flat-valgus foot deformities. Neurophysiological evaluations revealed prolonged central motor conduction times, low-amplitude and chronodispersed cortical motor responses, and a bilateral reduction of compound muscle action potential amplitude in the posterior tibial nerves with preserved sensory conduction. Needle electromyography demonstrated chronic neurogenic changes in the L3 to S1 myotomes. Brain MRI at age 16 initially showed faint T2/FLAIR hypointensities in the globus pallidus, substantia nigra, red nuclei, and dentate nuclei; however, follow-up susceptibility-weighted imaging and diffusion tensor imaging were normal, indicating the initial signal alterations were likely high-field artifacts. Spinal MRI demonstrated attenuation of cervical lordosis and minimal disc protrusions at C5 to C6 and D6 to D7, without evidence of spinal cord lesions. Targeted genetic testing for *SPG3A*, *SPG4*, *SPG5*, and Kennedy disease was negative. His clinical course remains stable under management with oral baclofen and physiotherapy, presenting a clinical picture consistent with a non-progressive complex hereditary spastic paraplegia or distal spinal muscular atrophy phenotype.

**Case 2**

The proband is a 13-year-old male with an unremarkable family history and no reported consanguinity, born at 37 weeks of gestation following an uncomplicated pregnancy and delivery with normal birth parameters (weight 2760 g, length 49 cm). Early infancy was complicated by feeding difficulties and frequent bowel movements. He subsequently presented with global developmental delay, encompassing significant motor and speech delays, and mild intellectual disability with an IQ of 54. Notably, no psychomotor regression has been observed. Anthropometric evaluation at 11 years of age revealed short stature and microcephaly (height 116 cm, −2.47 SD; head circumference 49.6 cm, −2.45 SD; weight 43.4 kg, +0.14 SD). Neurological examination demonstrated generalized hypotonia, spasticity particularly affecting the hip abductors and hamstrings, paraparesis, weak deep tendon reflexes, and ataxia characterized by a severely imbalanced, uncoordinated gait with short and unsteady steps. Additional motor findings included dystonia and appendicular muscle weakness. There is no history of seizures, and both electroencephalogram and electrocardiogram evaluations were unremarkable. Systemic assessments revealed no dysmorphic features or significant cardiac, ophthalmologic, or musculoskeletal abnormalities. Brain MRI demonstrated a diffuse, bilateral, and symmetrical delay of white matter myelination involving deep and subcortical regions, particularly within the frontal and temporal lobes. Additional imaging findings included a hypoplastic corpus callosum and abnormal T2 hyperintensity in the left caudate nucleus, altogether raising strong clinical consideration for a hypomyelinating leukodystrophy.

**Case 3**

The proband is a 2-year-old female born to non-consanguineous parents following an uncomplicated pregnancy and delivery at 39 weeks of gestation. Notably, birth parameters were markedly abnormal, indicating severe intrauterine growth restriction and congenital microcephaly (weight 2430 g, −3 SD; length 44.5 cm, −3 SD; head circumference 30.5 cm, −5 SD). The neonatal period was additionally complicated by pes varus and a congenital atrial communication. Growth has remained severely impaired, with anthropometric evaluation at 2 years of age demonstrating profound short stature, failure to thrive, and progressive microcephaly (height 72 cm, −4 SD; weight 7 kg, −4 SD; head circumference 40 cm, −6 SD). She presents with severe global developmental delay, evidenced by an absence of expressive language and an inability to walk independently at 2 years of age. Although her developmental trajectory is characterized by severe stagnation, there is no documented history of psychomotor regression. Neurological examination was notable for the absence of spasticity, hypotonia, or abnormal movements, alongside normal deep tendon reflexes and no history of clinical seizures or sleep disturbances. Brain MRI performed at 2 years of age revealed global cerebellar atrophy and microcephaly, with completely preserved cortical and white matter architecture. Additional clinical features include strabismus and mild facial dysmorphism characterized by a sloping forehead, long eyelashes, and a wide mouth, while auditory evoked potentials and other systemic evaluations were unremarkable.

**Cases 4 and 5**

Cases 4 and 5 represent two historical sibling cases born in 1950 and 1955, both of whom experienced early infantile lethality, passing away between 1 and 2 years of age and within the first year of life, respectively. Unfortunately, no clinical records or biological samples are available for these deceased offspring to ascertain specific phenotypic details or directly confirm their genotype. However, contemporary genetic analysis of both parents confirmed that they are heterozygous carriers of a *SNAPC4* frameshift variant. The familial history of recurrent early infant death strongly suggests a severe, lethal autosomal recessive condition. Supporting the profound pathogenicity of this variant, population-level genomic data from an Icelandic cohort of over 173,000 genotyped individuals revealed a minor allele frequency of 0.28 percent (945 heterozygous carriers) with a complete absence of homozygous individuals in the dataset. Together, the historical pedigree and large-scale population data strongly imply that a biallelic state for this specific truncating allele results in an embryonic or early infantile lethal developmental phenotype.

**Case 6**

The proband is a 15-year-old female born to healthy, non-consanguineous parents. The pregnancy was complicated by maternal gestational diabetes managed with labetalol and maternal factor V Leiden managed with enoxaparin. Delivery occurred at 37 weeks of gestation with normal birth parameters (weight 3055 g, length 49 cm, head circumference 34 cm) and no reported perinatal complications. Early psychomotor development was typical until approximately 18 months of age, when she experienced significant developmental regression predominantly affecting speech, while motor milestones remained intact. She is currently non-verbal and presents with severe intellectual disability and prominent neurobehavioral disturbances, including severe behavioral insomnia, hand flapping, pacing, pinching, and self-injurious behaviors such as head banging. Neurological examination revealed normal muscle tone and deep tendon reflexes, with an absence of spasticity, ataxia, or dystonia, although mild clumsiness was noted. Her clinical course is further complicated by epilepsy, with onset at 2 years of age initially characterized by absence seizures and later progressing to an episode of febrile status epilepticus at age 7. Electroencephalography demonstrated generalized rhythmic slowing and epileptiform discharges. Seizures have been successfully controlled with valproic acid, and she has remained seizure-free since 2019. Brain MRI performed at 3 years of age was completely normal, and a follow-up study is currently pending. Additional systemic findings include constipation, insulin resistance, and mild musculoskeletal anomalies such as flat feet and long, tapering fingers, with no recognizable facial dysmorphism or sensory organ abnormalities.

**Case 7**

The proband is a 3-year-old male born to healthy, non-consanguineous parents without a family history of seizures. The pregnancy was complicated by maternal gestational diabetes and anemia, which were managed with metformin, low-dose aspirin, and iron supplementation. Delivery occurred at 38 weeks and 1 day of gestation, complicated by perinatal distress secondary to a nuchal cord with transient cyanosis that resolved rapidly following initial nursery care. Birth parameters were normal (weight 3.2 kg, length 50.5 cm), and isolated ankyloglossia was noted. Early infancy was marked by feeding difficulties, including medically managed gastroesophageal reflux disease, occasional constipation, and a sensitive gag reflex that complicated the transition to solid foods. At 6 months of age, growth parameters remained within normal limits (weight 8.4 kg, length 66 cm, head circumference 44.5 cm). Developmentally, while alert and capable of cooing and smiling, he exhibited early signs of global delay. Motor assessments revealed an aversion to prone positioning, an inability to roll from supine to prone, and delayed fine motor skills (grasping objects without bringing them to the mouth), although he was beginning to sit unsupported. Socially, he demonstrated inconsistent eye contact and a limited response to his name. Neurological evaluation was notable for intermittent, unprovoked involuntary movements involving the neck, trunk, and face. He experienced two distinct seizure-like episodes at 1.5 and 6 weeks of age, characterized by ocular deviation, lateral head version, and generalized jerking lasting approximately 30 seconds. A subsequent electroencephalogram at 2 months of age was normal, and antiepileptic therapy was not initiated. Physical examination at 6 months noted plagiocephaly and macrocephaly, with no other dysmorphic, cardiac, or musculoskeletal abnormalities. Brain magnetic resonance imaging has not yet been performed. Of note, a prior epilepsy gene panel identified a maternally inherited *SPTAN1* variant of uncertain significance.

**Case 8**

The proband is a 23-year-old female born at term following an uncomplicated pregnancy and delivery, with normal neonatal growth parameters (birth weight 7 lbs 13 oz, length 18 inches). Early psychomotor and cognitive development was entirely unremarkable, with no evidence of developmental delay, speech delay, or intellectual disability, and she achieved normal motor milestones and academic performance. At approximately 21 years of age, she began to experience progressive muscle spasms and weakness. These symptoms initially affected the left-sided extremities, presenting as shoulder tightness, ptosis, and a left foot drop, before eventually extending to the right thigh. The condition has progressively worsened over a two-year period, resulting in spastic paraparesis, severe gait instability, and wheelchair dependency. She also reports prominent nocturnal worsening of spasms and significant fatigue following minimal exertion. Neurological examination revealed hyperreflexia, a tremor that initially affected the left hand but recently involved the right, and spasticity that remains predominantly on the left side. Dysphagia is a prominent feature requiring a pureed diet, with episodes of esophageal spasms confirmed by formal swallow evaluation and endoscopy. Furthermore, speech difficulties exacerbate with fatigue, strongly suggesting bulbar involvement. Electromyography and standard nerve conduction studies were normal, effectively excluding a peripheral neuropathy, and repetitive nerve conduction studies were similarly unremarkable. Pulmonary function tests remained within normal limits. Brain MRI was unremarkable, demonstrating only a stable left temporal arachnoid cyst, mild cerebellar atrophy, and minor nonspecific white matter lesions possibly related to a history of migraines, while spinal MRI was completely normal. Her past medical history is notable for Hashimoto thyroiditis. The family history includes a brother with focal epilepsy, a maternal cousin with intellectual disability, and several extended relatives with late-onset neurological or psychiatric disorders. The clinical course and radiological findings revealed adult-onset progressive motor disorder, including late-onset spastic paraplegia with bulbar involvement and mild cerebellar atrophy.

**Case 9**

The proband is a 23-year-old female born at 36 weeks of gestation following a pregnancy complicated by maternal hypertension. Birth parameters were below the normal range, indicative of intrauterine growth restriction (weight 1960 g; length 43 cm, -3 SD; head circumference 32 cm, 3rd percentile). The neonatal period was notable for respiratory distress, and early infancy was marked by failure to thrive. From early childhood, she demonstrated learning difficulties and limited problem-solving abilities. Notably, cognitive decline became more evident during adolescence around 15 years of age, culminating in mild intellectual disability, dysarthric but intelligible speech, and documented psychomotor regression. Neurological examination revealed axial hypotonia, hyperreflexia, and spastic paraparesis predominantly involving the hip abductors and hamstrings. Gait analysis highlighted tiptoe walking, shortened steps, increased hip adduction, persistent knee flexion, and an absence of physiological arm swing, accompanied by trunk anteropulsion and a forward head posture. Additional motor findings included mild intention tremor and dysmetria. Brain MRI demonstrated discrete prominence of the occipital sulci with volume reduction of the adjacent parenchyma, alongside asymmetric dilation of the occipital horns and atria of the lateral ventricles, suggestive of mild structural alterations of uncertain significance. Systemic and neurobehavioral evaluation revealed myopia, astigmatism, severe insomnia, and psychiatric comorbidities including panic disorder and mixed anxiety-depressive disorder. There is no history of clinical seizures, hearing loss, or recognizable facial dysmorphism. At her most recent examination, her height was 143 cm and weight was 38 kg, consistent with proportionate short stature, a trait also observed in her paternal lineage. Familial segregation confirmed an affected brother harboring the same biallelic *SNAPC4* genotype.

**Case 10**

The proband is a 10-year-old female born at 38 weeks and 4 days of gestation via uncomplicated vaginal delivery, with normal neonatal parameters (birth weight 3260 g, length 49.5 cm) and an absence of perinatal complications. Whole-genome sequencing identified compound heterozygous *SNAPC4* variants, with biparental inheritance confirmed. Early psychomotor development was largely typical, although a mild speech delay was noted which subsequently improved with targeted therapy. Broader developmental concerns emerged at school age, primarily characterized by learning difficulties and attention deficits. Formal cognitive testing revealed an IQ of 85, indicative of borderline intellectual functioning. Notably, there has been no documented psychomotor regression or gross motor delay. Neurological examination demonstrated normal muscle tone, strength, and deep tendon reflexes, with no evidence of ataxia, spasticity, or abnormal movements. Brain MRI performed at 1 year of age for the evaluation of microcephaly was structurally normal. At her most recent evaluation at 10 years of age, she demonstrated persistent microcephaly (head circumference 48 cm, <1st percentile), alongside normal stature (67th percentile) and weight (39th percentile), although bone age evaluation revealed delayed skeletal maturation. Comprehensive behavioral and psychiatric assessments confirmed attention deficit hyperactivity disorder, disruptive mood dysregulation disorder, and conduct disorder, which are currently managed with behavioral therapy. Physical examination highlighted mild facial features including an arched palate, synophrys, and long eyelashes, without other gross dysmorphisms. Systemic evaluation was otherwise entirely unremarkable, with no reported cardiac, ophthalmologic, musculoskeletal, gastrointestinal, or urogenital abnormalities.

**Case 11**

The proband is a 4-month-old female infant born prematurely at 36 weeks of gestation following a pregnancy complicated by maternal *Escherichia coli* bacteriuria. Delivery was notable for symmetrical intrauterine growth restriction, with a birth weight of 1730 g, a length of 40 cm, and a head circumference of 29 cm, alongside Apgar scores of 6, 7, and 8 at 1, 3, and 5 minutes, respectively. Family history was unremarkable, and trio whole-exome sequencing identified biparentally inherited compound heterozygous *SNAPC4* variants. By 3 months of age, she continued to exhibit profound growth restriction (weight 2340 g, length 44 cm, head circumference 30 cm) exacerbated by significant feeding difficulties and failure to thrive. Clinically, she presented with severe global developmental delay, motor delay, and generalized hypotonia, with no documented history of seizures. Physical examination highlighted distinct facial dysmorphism characterized by short and narrow palpebral fissures, microstomia, retrognathia, and a short neck. Dermatological and appendicular assessments noted dry, flaky skin accompanied by generalized edema, abnormal dermatoglyphics, and plantar flexion of the feet. Systemic evaluation further identified a congenital ventricular septal defect. Neuroimaging was pursued to determine the underlying etiology; initial transfontanellar echography revealed moderate dilation of the lateral ventricles, while a subsequent brain MRI performed at 4 months of age demonstrated severe structural anomalies, including pontocerebellar atrophy with hypoplasia of the vermis and cerebellum, hypoplasia of the corpus callosum, hydrocephalus, and generalized cortical atrophy.

**Case 12**

The proband is an 18-year-old female born at term at 40 weeks of gestation following an uneventful pregnancy and delivery. Birth parameters were within the normal range (weight 3230 g, length 50 cm, head circumference 33.5 cm), with no reported perinatal complications. Genomic analysis identified biparentally inherited compound heterozygous *SNAPC4* variants. Developmental delay was noted from 6 months of age, initially manifesting as delayed head control. She exhibited persistent motor and speech delays and remains non-ambulatory at 18 years of age. Neurological examination revealed generalized hypotonia, lower limb spasticity with paraparesis, associated muscle weakness, and ataxia, alongside brisk deep tendon reflexes. Notably, there has been no history of psychomotor regression, clinical seizures, or sleep disturbances. Cognitive assessment indicated mild intellectual disability, with appropriate behavior and an absence of psychiatric or behavioral disorders. Anthropometric evaluation at her most recent examination revealed short stature (height 147 cm, -2.86 SD) despite a normal parental target height (+0.8 SD), while head circumference (55 cm, M SD) and weight (50 kg, -0.46 SD) remained within normal limits. Brain MRI performed at 5 years of age was completely normal, showing no evidence of cerebral or cerebellar atrophy, white matter alterations, or structural abnormalities. Additional systemic findings include mild scoliosis and facial dysmorphism characterized by synophrys, with no reported cardiac, ophthalmologic, auditory, endocrine, or gastrointestinal abnormalities.

**Case 13**

The proband is a 4-year-old male born preterm at 30 weeks of gestation via cesarean section following a pregnancy complicated by oligohydramnios. Birth weight was 980 g, and the neonatal period was marked by complications related to prematurity, with early growth further affected by feeding difficulties and failure to thrive. Developmentally, he presents with global developmental delay and mild to moderate intellectual disability. Speech is significantly delayed; babbling commenced at 8 months and the first word emerged at 2.5 years, with no two-word combinations to date, rendering him fully dependent on his parents for daily care. Although he exhibits mild motor delay, he is currently able to walk independently. Neurological examination is notable for spasticity predominantly affecting the lower limbs, spastic diplegia, and hyperreflexia in the lower extremities. Muscle tone and strength are otherwise normal, with no evidence of dystonia, tremor, or ataxia, and there is no history of clinical seizures, sleep disturbances, or behavioral abnormalities. Brain MRI revealed lissencephaly, characterized by bilateral frontoparietal, temporal, and occipital cortical thickening with decreased sulcation and gyration, consistent with the lissencephaly and pachygyria spectrum, without additional cerebral or cerebellar atrophy. Physical examination demonstrated microcephaly (head circumference 46 cm), a long facial shape, and dental abnormalities, with no evidence of cardiac, skeletal, ophthalmologic, or urogenital malformations.

**Case 14**

The proband is a 9-year-old male born to consanguineous parents who are second-degree cousins. Pregnancy and delivery were unremarkable, with no reported perinatal complications or early feeding difficulties. Genomic analysis via whole-genome sequencing identified a homozygous *SNAPC4* splice-site variant. Developmentally, the patient presented with autism spectrum disorder, characterized by poor social interaction and limited eye contact, alongside delayed speech and language development and documented psychomotor regression. His expressive speech remains significantly limited. Neurological evaluation revealed no history of seizures, movement disorders, or abnormalities in muscle tone, and both electroencephalogram and brain MRI were normal, showing no evidence of cerebral or cerebellar atrophy, white matter alterations, or other structural abnormalities. At the time of examination, his weight was 22 kg and height was 110 cm. There is no personal or family history of epilepsy or autism, and physical examination revealed no dysmorphic features or other systemic abnormalities.

| Variant (Protein/cDNA) | Type | Zygosity | ACMG Evidence Codes | Final Classification | Key Justification |
| --- | --- | --- | --- | --- | --- |
| c.1889_1899del, p.(Val630Glyfs*76) | Frameshift | CH (Case 1) | PVS1, PM2, PP3, PP4 | Pathogenic | 11bp deletion causing frameshift; CADD 32 (PP3); absent from population databases (PM2); consistent with spastic paraparesis phenotype (PP4) |
| c.1436T>C, p.(Ile479Thr) | Missense | CH (Case 1) | PM1, PM2, PM3, PP3, PP4 | Likely Pathogenic | Within DNA-proximal core; in trans with LoF variant (PM3); CADD 27.4 (PP3); consistent with spastic paraparesis (PP4) |
| c.451A>T, p.(Lys151*) | Nonsense | Hom (Case 2) | PVS1, PM2, PP4 | Pathogenic | Introduces early stop codon in exon 4; NMD expected (PVS1); absent from gnomAD (PM2); phenotype matches core cohort (PP4) |
| c.2527+1G>A | Canonical splice | Hom (Case 3) | PVS1, PM2, PP4 | Pathogenic | Abolishes donor site; homozygous in patient with severe growth restriction and microcephaly (PVS1, PP4); absent from population databases (PM2) |
| c.3378_3385del, p.(Arg1126Serfs*58) | Frameshift | Hom (Case 4/5/6) | PVS1, PM2, PP4 | Pathogenic | Icelandic founder variant; results in early infantile lethality in biallelic state (PVS1); absent from homozygous population records (PM2) |
| c.490G>C, p.(Asp164His) | Missense | CH (Case 6) | PM1, PM2, PM3, PP3, PP4, PS3_supp | Likely Pathogenic | Affects conserved Pol II interface (PM1); in trans with LoF (PM3); CADD 27 (PP3); PPI modeling shows significant affinity reduction (ΔΔG -1.05) (PS3) |
| c.3758_3788del, p.(Asp1253Glyfs*144) | Frameshift | CH (Case 7) | PVS1, PM2, PP4 | Pathogenic | Truncating variant in C-terminal region; in trans with p.(Gln1428Glu); consistent with global developmental delay and movement disorder (PVS1, PP4) |
| c.4282C>G, p.(Gln1428Glu) | Missense | CH (Case 7) | PM2, PM3, PP4 | VUS | CADD 6.071 and PolyPhen 0.009 (Benign) preclude PP3; while in trans with LoF (PM3), low computational support requires conservative VUS classification |
| c.2410G>A, p.(Gly804Ser) | Missense | CH (Case 8) | PM2, PM3, PP3, PP4 | Likely Pathogenic | Ultra-rare; in trans with pathogenic nonsense (PM3); CADD 25.7 (PP3); phenotype involves psychomotor regression (PP4) |
| c.2771C>T, p.(Ser924Phe) | Missense | CH (Case 8) | PM2, PM3, PP3, PP4 | Likely Pathogenic | Ultra-rare; in trans with LoF (PM3); CADD 23.1 and PolyPhen 0.98 (PP3); consistent with Case 9 clinical course (PP4) |
| c.1211G>A, p.(Trp404*) | Nonsense | CH (Case 9) | PVS1, PM2, PP4 | Pathogenic | Early premature termination codon; in trans with p.(Ala415Val); associated with psychomotor regression and spasticity (PVS1, PP4) |
| c.1244C>T, p.(Ala415Val) | Missense | CH (Case 9) | PM2, PM3, PP3, PP4 | Likely Pathogenic | Rare missense in trans with pathogenic nonsense (PM3); CADD 28.9 and PolyPhen 1.0 (PP3); phenotypic match with Case 9 (PP4) |
| c.1073C>T, p.(Thr358Met) | Missense | CH (Case 10) | PM1, PM2, PM3, PP3, PP4, PS3_supp | Likely Pathogenic | Located in Pol II/III binding interface (PM1); in trans with p.(Leu1454His) (PM3); CADD 24 (PP3); PPI modeling shows complex destabilization (PS3) |
| c.4361T>A, p.(Leu1454His) | Missense | CH (Case 10) | PM2, PM3, PP4 | Likely Pathogenic | In trans with p.(Thr358Met) (PM3); matches Case 10 psychiatric/ADHD phenotype (PP4); absent from population databases (PM2) |
| c.1306G>A, p.(Asp436Asn) | Missense | CH (Case 11) | PM1, PM2, PP3, PP4 | Likely Pathogenic | Located in conserved DNA-binding Myb-type 2 domain (PM1); CADD 33 (PP3); matches severe growth restriction phenotype (PP4) |
| c.4124C>T, p.(Pro1375Leu) | Missense | CH (Case 11) | PM2, PP3, PP4 | VUS | Rare and predicted damaging by CADD (25.3), but limited clinical specificity in this context prevents upgrade to Likely Pathogenic (VUS) |
| c.914T>A, p.(Leu305Gln) | Missense | CH (Case 12) | PM2, PM3, PP3, PP4 | Likely Pathogenic | Located in HTH Myb-type 1 domain; in trans with large deletion (PM3); CADD 24.7 (PP3); matches non-ambulatory spasticity phenotype (PP4) |
| Exons 14–19 deletion | CNV | CH (Case 12) | PVS1, PM2, PP4 | Pathogenic | Large multi-exon deletion predicted to cause NMD or critical truncation; in trans with p.(Leu305Gln) in a non-ambulatory patient (PVS1, PP4) |
| c.2067+1G>T | Canonical splice | Hom (Case 13/14) | PVS1, PM2, PP4 | Pathogenic | Abolishes essential donor site; found in multiple patients (Case 14) with lissencephaly or ASD (PVS1, PP4); absent from gnomAD (PM2) |

1. **Supplemental Tables**

**Table S1.** Variant classification according to ACMG/AMP criteria

Summary of the nineteen *SNAPC4* variants identified in fifteen affected individuals. For each variant, the genomic position, predicted protein change, zygosity, inheritance, and ACMG/AMP classification are reported. Variant interpretation followed ACMG/AMP and ClinGen guidelines, integrating population frequency (PM2), predicted or proven loss of function (PVS1), segregation or de novo status (PP1, PS2), functional or structural modeling data (PS3_supporting), domain conservation (PM1), and computational evidence (PP3). Truncating, splice-site, and multi-exon deletion variants were classified as pathogenic, whereas missense variants supported by multiple lines of in silico and structural evidence were considered likely pathogenic. Abbreviations: Hom, homozygous; CH, compound heterozygous; LoF, loss of function; NMD, nonsense-mediated decay; ΔΔG, change in binding free energy.

**Table S2.** Structural and functional impact predictions for SNAPC4 variants.

| Variant | ΔΔG (kcal/mol) | SIFT score | PolyPhen-2 score | CADD PHRED-scaled score |
| --- | --- | --- | --- | --- |
| D164H | 0.113 | 0 | 0.953 | 27 |
| L305Q | 3.2094 | 0 | 1 | 24.7 |
| T358M | -0.1071 | 0 | 0.975 | 24 |
| A415V | 0.9475 | 0 | 1 | 28.9 |
| D436N | 0.1467 | 0 | 1 | 33 |
| I479T | 2.3531 | 0 | 0.913 | 27.4 |
| G804S | 0.051 | 0 | 0.999 | 25.7 |
| S924F | 0.287 | 0 | 0.98 | 23.1 |
| P1375L | 0.2912 | 0 | 0.995 | 25.3 |
| Q1428E | -0.1765 | 0.1 | 0.009 | 6.071 |
| L1454H | 0.1221 | 0 | 0 (unknown) | 18.21 |

ΔΔG values were calculated using ThermoMPNN; positive values indicate protein destabilization, while negative values suggest increased stability. SIFT scores range from 0 to 1, with scores ≤0.05 interpreted as deleterious. PolyPhen-2 scores range from 0 to 1, with higher values indicating greater likelihood of damaging; scores greater than 0.908 are considered probably damaging. CADD PHRED-scaled scores reflect the deleteriousness of variants on a genome-wide scale; scores above 20 are considered potentially pathogenic.

**Table S3.** Experimentally determined protein–protein complexes containing .

| Complex name | PDB ID | Total number of subunits | SNAPC4 chain ID | SNAPC4 residues present in structure |
| --- | --- | --- | --- | --- |
| SNAPc-containing RNA polymerase II pre-initiation complex bound to U1 snRNA promoter | 7ZXE | 10 | c | 81-398 |
| RNA polymerase III pre-initiation complex closed DNA 1 | 8ITY | 25 | 4 | 149-513 |
| SNAPc:TBP–TFIIA–TFIIB sub-complex bound to U5 snRNA promoter | 7ZWC | 10 | c | 81-398 |
| RNA polymerase III pre-initiation complex melting complex 1 | 8IUE | 25 | 4 | 149-513 |
| RNA polymerase III pre-initiation complex open complex 1 | 8IUH | 25 | 4 | 149-513 |
| RNA polymerase III class III open pre-initiation complex 1 | 9FSO | 25 | W | 142-383 |
| RNA polymerase III class III open pre-initiation complex 2 | 9FSP | 25 | W | 142-383 |
| RNA polymerase III class III melting pre-initiation complex | 9FSQ | 25 | W | 142-383 |
| RNA polymerase III class III open mini pre-initiation complex 1 | 9FSR | 25 | W | 142-383 |
| RNA polymerase III class III open mini pre-initiation complex 2 | 9FSS | 25 | W | 142-383 |

**Table S4.** Predicted change in protein–protein interaction affinity (ΔΔGAffinity, kcal/mol) for SNAPC4 variants in selected complexes. Negative values indicate reduced affinity.

| Complex name | Variant | ΔΔGAffinity (mCSM-PPI2) | ΔΔGAffinity (DDMut-PPI) |
| --- | --- | --- | --- |
| SNAPc-containing RNA polymerase II pre-initiation complex bound to U1 snRNA promoter | D164H | -1.053 | -0.477 |
| L305Q | -0.425 | -0.442 |
| T358M | -0.046 | -0.146 |
| SNAPc:TBP–TFIIA–TFIIB sub-complex bound to U5 snRNA promoter | D164H | -0.226 | -0.396 |
| L305Q | -0.391 | -0.331 |
| T358M | -0.157 | -0.064 |

**4. Supplemental Figure**

##
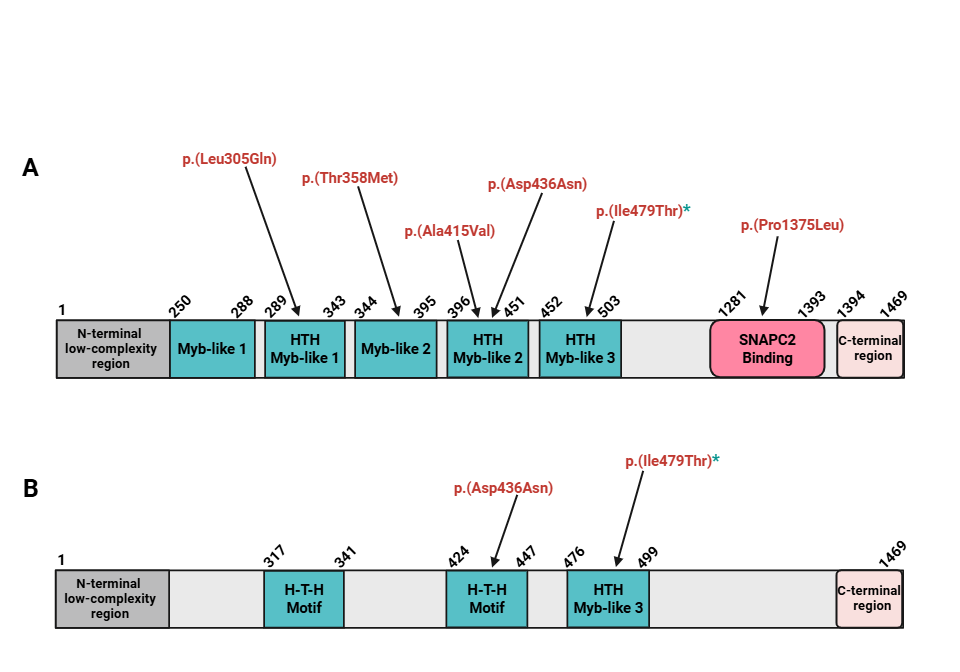


**Figure S1. Schematic representation of SNPC4 protein domains and location of selected missense variants.**

**(A)** Missense variants located within the annotated Myb-like and HTH Myb-type domains, as well as within the SNAPC2-binding region of the full-length SNAPC4 protein, are highlighted. The positions of the variants p.(Leu305Gln), p.(Thr358Met), p.(Ala415Val), p.(Asp436Asn), p.(Ile479Thr), and p.(Pro1375Leu) are shown relative to these domains. **(B)** Location of DNA-binding H-T-H motifs within SNPC4. Variants p.(Asp436Asn) and p.(Ile479Thr) are situated within conserved H-T-H motifs involved in DNA interaction. Domain annotations were extracted from UniProt (accession Q5SXM2).

**5. Supplemental Videos**

**Supplementary Movie 1. Spontaneous locomotion in wild-type zebrafish larvae.**

Representative video of wild-type (WT) zebrafish larvae at 5 days post-fertilization (dpf) showing normal spontaneous locomotor activity.

**Supplementary Movie 2. Reduced locomotor activity in *snapc4s445* mutant larvae.**

Representative video of *snapc4s445* mutant zebrafish larvae at 5 days post-fertilization (dpf) showing markedly reduced spontaneous locomotion compared to WT controls.

1. **Supplemental References**
2. Aspromonte MC, Bellini M, Gasparini A, Carraro M, Bettella E, Polli R, Cesca F, Bigoni S, Boni S, Carlet O, Negrin S, Mammi I, Milani D, Peron A, Sartori S, Toldo I, Soli F, Turolla L, Stanzial F, Benedicenti F, Marino-Buslje C, Tosatto SCE, Murgia A, Leonardi E. Characterization of intellectual disability and autism comorbidity through gene panel sequencing. Hum Mutat. 2019 Sep;40(9):1346-1363. doi: 10.1002/humu.23822. Epub 2019 Aug 2. Erratum in: Hum Mutat. 2020 Jun;41(6):1183.
3. Bowling KM, Thompson ML, Amaral MD, Finnila CR, Hiatt SM, Engel KL, Cochran JN, Brothers KB, East KM, Gray DE, Kelley WV, Lamb NE, Lose EJ, Rich CA, Simmons S, Whittle JS, Weaver BT, Nesmith AS, Myers RM, Barsh GS, Bebin EM, Cooper GM. Genomic diagnosis for children with intellectual disability and/or developmental delay. Genome Med. 2017 May 30;9(1):43. doi: 10.1186/s13073-017-0433-1.
4. Harripaul R, Noor A, Ayub M, Vincent JB. The Use of Next-Generation Sequencing for Research and Diagnostics for Intellectual Disability. Cold Spring Harb Perspect Med. 2017 Mar 1;7(3):a026864. doi: 10.1101/cshperspect.a026864. PMID: 28250017; PMCID: PMC5334248.
5. Murdock DR, Dai H, Burrage LC, Rosenfeld JA, Ketkar S, Müller MF, Yépez VA, Gagneur J, Liu P, Chen S, Jain M, Zapata G, Bacino CA, Chao HT, Moretti P, Craigen WJ, Hanchard NA; Undiagnosed Diseases Network, Lee B. Transcriptome-directed analysis for Mendelian disease diagnosis overcomes limitations of conventional genomic testing. J Clin Invest. 2021 Jan 4;131(1):e141500. doi: 10.1172/JCI141500
6. Tarailo-Graovac M, Shyr C, Ross CJ, Horvath GA, Salvarinova R, Ye XC, Zhang LH, Bhavsar AP, Lee JJ, Drögemöller BI, Abdelsayed M, Alfadhel M, Armstrong L, Baumgartner MR, Burda P, Connolly MB, Cameron J, Demos M, Dewan T, Dionne J, Evans AM, Friedman JM, Garber I, Lewis S, Ling J, Mandal R, Mattman A, McKinnon M, Michoulas A, Metzger D, Ogunbayo OA, Rakic B, Rozmus J, Ruben P, Sayson B, Santra S, Schultz KR, Selby K, Shekel P, Sirrs S, Skrypnyk C, Superti-Furga A, Turvey SE, Van Allen MI, Wishart D, Wu J, Wu J, Zafeiriou D, Kluijtmans L, Wevers RA, Eydoux P, Lehman AM, Vallance H, Stockler-Ipsiroglu S, Sinclair G, Wasserman WW, van Karnebeek CD. Exome Sequencing and the Management of Neurometabolic Disorders. N Engl J Med. 2016 Jun 9;374(23):2246-55. doi: 10.1056/NEJMoa1515792.
7. Guillen Sacoto MJ, Tchasovnikarova IA, Torti E, Forster C, Andrew EH, Anselm I, Baranano KW, Briere LC, Cohen JS, Craigen WJ, Cytrynbaum C, Ekhilevitch N, Elrick MJ, Fatemi A, Fraser JL, Gallagher RC, Guerin A, Haynes D, High FA, Inglese CN, Kiss C, Koenig MK, Krier J, Lindstrom K, Marble M, Meddaugh H, Moran ES, Morel CF, Mu W, Muller EA 2nd, Nance J, Natowicz MR, Numis AL, Ostrem B, Pappas J, Stafstrom CE, Streff H, Sweetser DA, Szybowska M; Undiagnosed Diseases Network; Walker MA, Wang W, Weiss K, Weksberg R, Wheeler PG, Yoon G, Kingston RE, Juusola J. De Novo Variants in the ATPase Module of MORC2 Cause a Neurodevelopmental Disorder with Growth Retardation and Variable Craniofacial Dysmorphism. Am J Hum Genet. 2020 Aug 6;107(2):352-363. doi: 10.1016/j.ajhg.2020.06.013. Epub 2020 Jul 20. PMID: 32693025; PMCID: PMC7413887.
8. Retterer K, Juusola J, Cho MT, Vitazka P, Millan F, Gibellini F, Vertino-Bell A, Smaoui N, Neidich J, Monaghan KG, McKnight D, Bai R, Suchy S, Friedman B, Tahiliani J, Pineda-Alvarez D, Richard G, Brandt T, Haverfield E, Chung WK, Bale S. Clinical application of whole-exome sequencing across clinical indications. Genet Med. 2016 Jul;18(7):696-704. doi: 10.1038/gim.2015.148. Epub 2015 Dec 3. PMID: 26633542.
9. DePristo MA, Banks E, Poplin R, et al. A framework for variation discovery and genotyping using next-generation DNA sequencing data. Nat Genet. 2011;43:491–8.
10. McKenna A, Hanna M, Banks E, et al. The Genome Analysis Toolkit: a MapReduce framework for analyzing next-generation DNA sequencing data. Genome Res. 2010;20:1297–303.
11. Wang K, Li M, Hakonarson H. ANNOVAR: functional annotation of genetic variants from high-throughput sequencing data. Nucleic Acids Res. 2010;38:e164.
12. Redon R, Carter NP. Comparative genomic hybridization: microarray design and data interpretation. Methods Mol Biol. 2009;529:37–49.
13. Retterer K, Scuffins J, Schmidt D, Lewis R, Pineda-Alvarez D, Stafford A, Schmidt L, Warren S, Gibellini F, Kondakova A, Blair A, Bale S, Matyakhina L, Meck J, Aradhya S, Haverfield E. Assessing copy number from exome sequencing and exome array CGH based on CNV spectrum in a large clinical cohort. Genet Med. 2015 Aug;17(8):623-9. doi: 10.1038/gim.2014.160. Epub 2014 Nov 6. PMID: 25356966.
